# Supplementary material
Source: ML conference proceedings conference paper supplement (https://proceedings.neurips.cc/paper_files/paper/2017/hash/6ef80bb237adf4b6f77d0700e1255907-Abstract.html)
Supplement: Supplementary file [file 6ef80bb237adf4b6f77d0700e1255907-Supplemental.zip]

---

# Supplementary Materials for “Accelerated First-order Methods for Geodesically Convex Optimization on Riemannian Manifolds”

---

Yuanyuan Liu<sup>1</sup>, Fanhua Shang<sup>1\*</sup>, James Cheng<sup>1</sup>, Hong Cheng<sup>2</sup>, Licheng Jiao<sup>3</sup>

<sup>1</sup>Dept. of Computer Science and Engineering, The Chinese University of Hong Kong

<sup>2</sup>Dept. of Systems Engineering and Engineering Management,  
The Chinese University of Hong Kong, Hong Kong

<sup>3</sup>Key Laboratory of Intelligent Perception and Image Understanding of Ministry of Education,  
School of Artificial Intelligence, Xidian University, China

{yyliu, fhshang, jcheng}@cse.cuhk.edu.hk; hcheng@se.cuhk.edu.hk;  
lchjiao@mail.xidian.edu.cn

In this supplementary material, we give the detailed proofs for some lemmas, theorems and properties.

## A Proof of Property 1:

**Property 1.** *The loss function  $f(\cdot)$  is defined in (9) with the inner product in (10), then*

1.  $\text{Exp}_{Y_k}^{-1}(X_k) = Y_k^{1/2} \log(Y_k^{-1/2} X_k Y_k^{-1/2}) Y_k^{1/2};$
2.  $\text{grad} f(Y_k) = \frac{1}{N} \sum_{i=1}^N Y_k^{1/2} \log(Y_k^{1/2} W_i^{-1} Y_k^{1/2}) Y_k^{1/2};$
3.  $\langle \text{grad} f(Y_k), \text{Exp}_{Y_k}^{-1}(X_k) \rangle_{Y_k} = \langle U, V \rangle;$
4.  $\|\text{grad} f(Y_k)\|_{Y_k}^2 = \|U\|_F^2,$

where  $U = \frac{1}{N} \sum_{i=1}^N \log(Y_k^{1/2} W_i^{-1} Y_k^{1/2}) \in \mathbb{R}^{d \times d}$ , and  $V = \log(Y_k^{-1/2} X_k Y_k^{-1/2}) \in \mathbb{R}^{d \times d}$ .

In the main paper, we proved the result (1) in Property 1. In the following, we will give the proofs for the results (2)-(4) in Property 1.

*Proof.* Using the derivation in [2], we have

$$\text{grad} f(Y_k) = \frac{1}{N} \sum_{i=1}^N Y_k^{1/2} \log(Y_k^{1/2} W_i^{-1} Y_k^{1/2}) Y_k^{1/2}.$$

---

\*Corresponding author.

Using the results (1) and (2) and the definition of the inner product, we have

$$\begin{aligned}
& \langle \text{grad} f(Y_k), \text{Exp}_{Y_k}^{-1}(X_k) \rangle_{Y_k} \\
&= \text{tr} \left( \left( \frac{1}{N} \sum_{i=1}^N Y_k^{1/2} \log(Y_k^{1/2} W_i^{-1} Y_k^{1/2}) Y_k^{1/2} \right) Y_k^{-1} Y_k^{1/2} \log(Y_k^{-1/2} X_k Y_k^{-1/2}) Y_k^{1/2} Y_k^{-1} \right) \\
&= \text{tr} \left( Y_k^{1/2} \left( \frac{1}{N} \sum_{i=1}^N \log(Y_k^{1/2} W_i^{-1} Y_k^{1/2}) \right) Y_k^{1/2} Y_k^{-1} Y_k^{1/2} \log(Y_k^{-1/2} X_k Y_k^{-1/2}) Y_k^{1/2} Y_k^{-1} \right) \\
&= \left\langle \frac{1}{N} \sum_{i=1}^N \log(Y_k^{1/2} W_i^{-1} Y_k^{1/2}), \log(Y_k^{-1/2} X_k Y_k^{-1/2}) \right\rangle \\
&= \langle U, V \rangle,
\end{aligned}$$

and

$$\|\text{grad} f(Y_k)\|_{Y_k}^2 = \left\| \frac{1}{N} \sum_{i=1}^N \log(Y_k^{1/2} W_i^{-1} Y_k^{1/2}) \right\|_F^2 = \|U\|_F^2.$$

This completes the proof.  $\square$

## B Proofs of Lemmas 1 and 2:

Before proving Lemma 1, we first give the following property [4].

**Property 2.** Let  $\Gamma_x^y : T_x \mathcal{M} \rightarrow T_y \mathcal{M}$  be the parallel transport, and the exponential map  $\text{Exp}_x$  has an inverse  $\text{Exp}_x^{-1} : \mathcal{X} \rightarrow T_x \mathcal{M}$ . For any  $x, y \in \mathcal{X}$ , and  $w, z \in T_x \mathcal{M}$ , we have the following properties:

$$\begin{aligned}
\langle w, z \rangle_x &= \langle \Gamma_x^y w, \Gamma_x^y z \rangle_y, \\
\|w\|_x^2 &= \|\Gamma_x^y w\|_y^2, \\
\|\text{Exp}_y^{-1}(x)\|_y^2 &= \|\text{Exp}_x^{-1}(y)\|_x^2 = d^2(x, y).
\end{aligned}$$

**Lemma 1** (Strongly  $G$ -convex). If  $f : \mathcal{X} \rightarrow \mathbb{R}$  is geodesically  $\mu$ -strongly convex and  $G$ - $L$ -smooth, and  $\{y_k\}$  satisfies the equation (4), and  $z_k$  is defined as

$$z_k = \left(1 - \sqrt{\frac{\mu}{L}}\right) \text{Exp}_{y_k}^{-1}(x_k) \in T_{y_k} \mathcal{M}.$$

Then the following results hold:

$$\Gamma_{y_k}^{y_{k-1}}(z_k - \beta \text{grad} f(y_k)) = \left(1 - \sqrt{\frac{\mu}{L}}\right)^{\frac{1}{2}} z_{k-1},$$

and

$$-\langle \text{grad} f(y_k), z_k \rangle_{y_k} + \frac{\beta}{2} \|\text{grad} f(y_k)\|_{y_k}^2 = \frac{1}{2\beta} \left(1 - \sqrt{\frac{\mu}{L}}\right) \|z_{k-1}\|_{y_{k-1}}^2 - \frac{1}{2\beta} \|z_k\|_{y_k}^2.$$

*Proof.* We recall the equation (4) in Algorithm 1,

$$\Gamma_{y_k}^{y_{k-1}} \left[ \left(1 - \sqrt{\frac{\mu}{L}}\right) \text{Exp}_{y_k}^{-1}(x_k) - \beta \text{grad} f(y_k) \right] = \left(1 - \sqrt{\frac{\mu}{L}}\right)^{\frac{3}{2}} \text{Exp}_{y_{k-1}}^{-1}(x_{k-1}).$$

We define  $z_k$  for any  $k = 0, \dots, K-1$  as follows:

$$z_k = \left(1 - \sqrt{\frac{\mu}{L}}\right) \text{Exp}_{y_k}^{-1}(x_k) \in T_{y_k} \mathcal{M}.$$

By the above two equalities, the following result holds:

$$\Gamma_{y_k}^{y_{k-1}} z_k - \Gamma_{y_k}^{y_{k-1}} \beta \text{grad} f(y_k) = \left(1 - \sqrt{\frac{\mu}{L}}\right)^{\frac{1}{2}} z_{k-1},$$

where  $z_{k-1} = \left(1 - \sqrt{\frac{\mu}{L}}\right) \text{Exp}_{y_{k-1}}^{-1}(x_{k-1}) \in T_{y_{k-1}} \mathcal{M}$ . Furthermore, by the above equality and the fact that  $\|u\|_x^2 = \|\Gamma_x^y u\|_y^2$ , then we have

$$\begin{aligned} \|z_k - \beta \text{grad} f(y_k)\|_{y_k}^2 &= \|\Gamma_{y_k}^{y_{k-1}} (z_k - \beta \text{grad} f(y_k))\|_{y_{k-1}}^2 \\ &= \left(1 - \sqrt{\frac{\mu}{L}}\right) \|z_{k-1}\|_{y_{k-1}}^2. \end{aligned}$$

By simple algebraic manipulations, we have

$$-\langle \text{grad} f(y_k), z_k \rangle_{y_k} + \frac{\beta}{2} \|\text{grad} f(y_k)\|_{y_k}^2 = \frac{1}{2\beta} \left(1 - \sqrt{\frac{\mu}{L}}\right) \|z_{k-1}\|_{y_{k-1}}^2 - \frac{1}{2\beta} \|z_k\|_{y_k}^2.$$

Using the above equality and the definition of  $z_k$ , we have

$$\begin{aligned} &\left(1 - \sqrt{\frac{\mu}{L}}\right) \langle \text{grad} f(y_k), -\text{Exp}_{y_k}^{-1}(x_k) \rangle_{y_k} + \frac{\beta}{2} \|\text{grad} f(y_k)\|_{y_k}^2 \\ &= \frac{1}{2\beta} \left(1 - \sqrt{\frac{\mu}{L}}\right) \|z_{k-1}\|_{y_{k-1}}^2 - \frac{1}{2\beta} \|z_k\|_{y_k}^2. \end{aligned}$$

This completes the proof.  $\square$

**Lemma 2.** *If  $f : \mathcal{X} \rightarrow \mathbb{R}$  is  $G$ -convex and  $G$ - $L$ -smooth, the diameter of domain is bounded by  $D$ ,  $\{y_k\}$  satisfies the equation (5), and  $z_k$  is defined as*

$$z_k = \frac{k}{\alpha - 1} \text{Exp}_{y_k}^{-1}(x_k) - D \hat{g}_k \in T_{y_k} \mathcal{M}.$$

*Then the following results hold:*

$$\Gamma_{y_{k+1}}^{y_k} z_{k+1} = z_k + \frac{(k + \alpha - 1)\eta}{\alpha - 1} \text{grad} f(y_k),$$

*and*

$$\frac{\alpha - 1}{k + \alpha - 1} \langle \text{grad} f(y_k), -z_k \rangle_{y_k} - \frac{\eta}{2} \|\text{grad} f(y_k)\|_{y_k}^2 = \frac{2(\alpha - 1)^2}{\eta(k + \alpha - 1)^2} \left[ \|z_k\|_{y_k}^2 - \|z_{k+1}\|_{y_{k+1}}^2 \right].$$

*Proof.* For any  $k = 0, \dots, K-1$ ,  $z_k$  is defined as follows:

$$z_k = \frac{k}{\alpha - 1} \text{Exp}_{y_k}^{-1}(x_k) - D \hat{g}_k,$$

where  $\hat{g}_k = \text{grad} f(y_k) / \|\text{grad} f(y_k)\|_{y_k}$ . Then  $z_k \in T_{y_k} \mathcal{M}$ , and by the equation (5) in Algorithm 2, we have

$$\begin{aligned} \Gamma_{y_k}^{y_{k-1}} z_k &= \frac{k-1}{\alpha-1} \text{Exp}_{y_{k-1}}^{-1}(x_{k-1}) - D \hat{g}_{k-1} + \frac{(k+\alpha-2)\eta}{\alpha-1} \text{grad} f(y_{k-1}) \\ &= z_{k-1} + \frac{(k+\alpha-2)\eta}{\alpha-1} \text{grad} f(y_{k-1}). \end{aligned}$$

That is,

$$\Gamma_{y_{k+1}}^{y_k} z_{k+1} = z_k + \frac{(k + \alpha - 1)\eta}{\alpha - 1} \text{grad} f(y_k).$$

Using the above equality and Property 2, we have

$$\begin{aligned} & \|z_{k+1}\|_{y_{k+1}}^2 \\ &= \left\| \Gamma_{y_{k+1}}^{y_k} z_{k+1} \right\|_{y_k}^2 \\ &= \left\| z_k + \frac{(k + \alpha - 1)\eta}{\alpha - 1} \text{grad} f(y_k) \right\|_{y_k}^2 \\ &= \|z_k\|_{y_k}^2 + \frac{2(k + \alpha - 1)\eta}{\alpha - 1} \langle \text{grad} f(y_k), z_k \rangle_{y_k} + \left( \frac{(k + \alpha - 1)\eta}{\alpha - 1} \right)^2 \|\text{grad} f(y_k)\|_{y_k}^2. \end{aligned}$$

That is,

$$\begin{aligned} & - \frac{2(k + \alpha - 1)\eta}{\alpha - 1} \langle \text{grad} f(y_k), z_k \rangle_{y_k} - \left( \frac{(k + \alpha - 1)\eta}{\alpha - 1} \right)^2 \|\text{grad} f(y_k)\|_{y_k}^2 \\ &= \|z_k\|_{y_k}^2 - \|z_{k+1}\|_{y_{k+1}}^2. \end{aligned}$$

By simple algebraic manipulations and the definition of  $z_k$ , we have

$$\begin{aligned} & \frac{2(\alpha - 1)^2}{\eta(k + \alpha - 1)^2} \left[ \|z_k\|_{y_k}^2 - \|z_{k+1}\|_{y_{k+1}}^2 \right] \\ &= \frac{\alpha - 1}{k + \alpha - 1} \langle \text{grad} f(y_k), -z_k \rangle_{y_k} - \frac{\eta}{2} \|\text{grad} f(y_k)\|_{y_k}^2 \\ &= \frac{k}{k + \alpha - 1} \langle \text{grad} f(y_k), -\text{Exp}_{y_k}^{-1}(x_k) \rangle_{y_k} + \frac{\alpha - 1}{k + \alpha - 1} \langle \text{grad} f(y_k), D\hat{g}_k \rangle_{y_k} - \frac{\eta}{2} \|\text{grad} f(y_k)\|_{y_k}^2 \\ &= \frac{k}{k + \alpha - 1} \langle \text{grad} f(y_k), -\text{Exp}_{y_k}^{-1}(x_k) \rangle_{y_k} + \frac{(\alpha - 1)D}{k + \alpha - 1} \|\text{grad} f(y_k)\|_{y_k} - \frac{\eta}{2} \|\text{grad} f(y_k)\|_{y_k}^2. \end{aligned}$$

This completes the proof.  $\square$

### C Proof of Lemma 3:

**Lemma 3.** Let  $\{x_k\}$  be the sequence produced by Algorithms 1 and 2 with  $\eta \leq 1/L$ . If  $f : \mathcal{X} \rightarrow \mathbb{R}$  is  $G$ -convex and  $G$ - $L$ -smooth for any  $x \in \mathcal{X}$ , then the following result holds:

$$f(x_{k+1}) \leq f(x) + \langle \text{grad} f(y_k), -\text{Exp}_{y_k}^{-1}(x) \rangle_{y_k} - \frac{\eta}{2} \|\text{grad} f(y_k)\|_{y_k}^2.$$

*Proof.* Since  $f(\cdot)$  is geodesically convex, then for any  $x \in \mathcal{X}$ , we have

$$f(x) \geq f(y_k) + \langle \text{grad} f(y_k), \text{Exp}_{y_k}^{-1}(x) \rangle_{y_k}. \quad (15)$$

Furthermore,  $f$  is geodesically  $L$ -smooth, i.e.,

$$f(x) \leq f(y_k) + \langle \text{grad} f(y_k), \text{Exp}_{y_k}^{-1}(x) \rangle_{y_k} + \frac{L}{2} \|\text{Exp}_{y_k}^{-1}(x)\|_{y_k}^2.$$

Since  $x_{k+1} = \text{Exp}_{y_k}(-\eta \text{grad} f(y_k)) \in \mathcal{X}$ , then  $\text{Exp}_{y_k}^{-1}(x_{k+1}) = -\eta \text{grad} f(y_k)$ , and by the above equality with  $x = x_{k+1}$ , and the step-size  $\eta \leq 1/L$ , we have

$$\begin{aligned} f(x_{k+1}) &\leq f(y_k) + \langle \text{grad} f(y_k), \text{Exp}_{y_k}^{-1}(x_{k+1}) \rangle_{y_k} + \frac{L}{2} \|\text{Exp}_{y_k}^{-1}(x_{k+1})\|_{y_k}^2 \\ &= f(y_k) - \eta \|\text{grad} f(y_k)\|_{y_k}^2 + \frac{L\eta^2}{2} \|\text{grad} f(y_k)\|_{y_k}^2 \\ &\leq f(y_k) - \frac{\eta}{2} \|\text{grad} f(y_k)\|_{y_k}^2. \end{aligned} \quad (16)$$

By (15) and (16), we have

$$f(x) - f(x_{k+1}) \geq \frac{\eta}{2} \|\text{grad} f(y_k)\|_{y_k}^2 + \langle \text{grad} f(y_k), \text{Exp}_{y_k}^{-1}(x) \rangle_{y_k}.$$

That is,

$$f(x_{k+1}) \leq f(x) + \langle \text{grad} f(y_k), -\text{Exp}_{y_k}^{-1}(x) \rangle_{y_k} - \frac{\eta}{2} \|\text{grad} f(y_k)\|_{y_k}^2, \quad \forall x \in \mathcal{M}.$$

This completes the proof.  $\square$

## D Proof of Theorem 1:

**Theorem 1** (Strongly  $G$ -convex). *Let  $x_\star$  be the optimal solution of Problem (1), and  $\{x_k\}$  be the sequence produced by Algorithm 1. If  $f : \mathcal{X} \rightarrow \mathbb{R}$  is geodesically  $\mu$ -strongly convex and  $G$ - $L$ -smooth, then the following result holds:*

$$f(x_{k+1}) - f(x_\star) \leq \left(1 - \sqrt{\frac{\mu}{L}}\right)^k \left[ f(x_0) - f(x_\star) + \frac{1}{2\beta} \left(1 - \sqrt{\frac{\mu}{L}}\right) \|z_0\|_{y_0}^2 \right],$$

where  $z_0$  is defined in Lemma 1.

*Proof.* By Lemma 3, we have

$$f(x_{k+1}) \leq f(x) + \langle \text{grad} f(y_k), -\text{Exp}_{y_k}^{-1}(x) \rangle_{y_k} - \frac{\eta}{2} \|\text{grad} f(y_k)\|_{y_k}^2, \quad \forall x \in \mathcal{X}. \quad (17)$$

Let us write successively this formula at  $x = x_k$  and  $x = x_\star$ , we have

$$f(x_{k+1}) \leq f(x_k) + \langle \text{grad} f(y_k), -\text{Exp}_{y_k}^{-1}(x_k) \rangle_{y_k} - \frac{\eta}{2} \|\text{grad} f(y_k)\|_{y_k}^2,$$

and

$$f(x_{k+1}) \leq f(x_\star) + \langle \text{grad} f(y_k), -\text{Exp}_{y_k}^{-1}(x_\star) \rangle_{y_k} - \frac{\eta}{2} \|\text{grad} f(y_k)\|_{y_k}^2. \quad (18)$$

Furthermore, the function  $f(\cdot)$  is  $\mu$ -strongly  $G$ -convex, that is,

$$f(x_\star) \geq f(y_k) + \langle \text{grad} f(y_k), \text{Exp}_{y_k}^{-1}(x_\star) \rangle_{y_k} + \frac{\mu}{2} \|\text{Exp}_{y_k}^{-1}(x_\star)\|_{y_k}^2.$$

Since  $f(x_\star) \leq f(y_k)$ , we have

$$\langle \text{grad} f(y_k), -\text{Exp}_{y_k}^{-1}(x_\star) \rangle_{y_k} \geq \frac{\mu}{2} \|\text{Exp}_{y_k}^{-1}(x_\star)\|_{y_k}^2.$$

Furthermore, we have

$$\begin{aligned} \frac{\mu}{2} \|\text{Exp}_{y_k}^{-1}(x_\star)\|_{y_k}^2 &\leq \langle \text{grad} f(y_k), -\text{Exp}_{y_k}^{-1}(x_\star) \rangle_{y_k} \\ &\leq \|\text{grad} f(y_k)\|_{y_k} \|\text{Exp}_{y_k}^{-1}(x_\star)\|_{y_k}. \end{aligned}$$

Thus, we have

$$\frac{\mu}{2} \|\text{Exp}_{y_k}^{-1}(x_\star)\|_{y_k} \leq \|\text{grad} f(y_k)\|_{y_k}.$$

Using the above analysis, we have

$$\begin{aligned} &\langle \text{grad} f(y_k), -\text{Exp}_{y_k}^{-1}(x_\star) \rangle_{y_k} \\ &\leq \|\text{grad} f(y_k)\|_{y_k} \|\text{Exp}_{y_k}^{-1}(x_\star)\|_{y_k} \\ &\leq \frac{2}{\mu} \|\text{grad} f(y_k)\|_{y_k}^2. \end{aligned}$$

Then (18) is rewritten as follows:

$$\begin{aligned} f(x_{k+1}) &\leq f(x_*) + \langle \text{grad} f(y_k), -\text{Exp}_{y_k}^{-1}(x_*) \rangle - \frac{\eta}{2} \|\text{grad} f(y_k)\|^2 \\ &\leq f(x_*) + \left(\frac{2}{\mu} - \frac{\eta}{2}\right) \|\text{grad} f(y_k)\|_{y_k}^2. \end{aligned} \quad (19)$$

Multiplying both sides of the inequality (17) by  $(1 - \sqrt{\mu/L})$ , and the inequality (19) by  $\sqrt{\mu/L}$ , then adding the two resulting inequalities with  $\eta = 1/L$ , we obtain

$$\begin{aligned} &f(x_{k+1}) \\ &\leq \left(1 - \sqrt{\frac{\mu}{L}}\right) f(x_k) + \sqrt{\frac{\mu}{L}} f(x_*) + \left(1 - \sqrt{\frac{\mu}{L}}\right) \langle \text{grad} f(y_k), -\text{Exp}_{y_k}^{-1}(x_k) \rangle_{y_k} + \frac{\beta}{2} \|\text{grad} f(y_k)\|_{y_k}^2, \end{aligned}$$

where  $\beta = \frac{4}{\sqrt{\mu L}} - \frac{1}{L} > 0$ . Let  $z_k = (1 - \sqrt{\frac{\mu}{L}}) \text{Exp}_{y_k}^{-1}(x_k)$ , then by the above inequality and Lemma 1, we have

$$\begin{aligned} f(x_{k+1}) &\leq \left(1 - \sqrt{\frac{\mu}{L}}\right) f(x_k) + \sqrt{\frac{\mu}{L}} f(x_*) - \langle \text{grad} f(y_k), z_k \rangle_{y_k} + \frac{\beta}{2} \|\text{grad} f(y_k)\|_{y_k}^2 \\ &\leq \left(1 - \sqrt{\frac{\mu}{L}}\right) f(x_k) + \sqrt{\frac{\mu}{L}} f(x_*) + \frac{1}{2\beta} \left(1 - \sqrt{\frac{\mu}{L}}\right) \|z_{k-1}\|_{y_{k-1}}^2 - \frac{1}{2\beta} \|z_k\|_{y_k}^2. \end{aligned}$$

That is,

$$\begin{aligned} &f(x_{k+1}) - f(x_*) \\ &\leq \left(1 - \sqrt{\frac{\mu}{L}}\right) [f(x_k) - f(x_*)] + \frac{1}{2\beta} \left(1 - \sqrt{\frac{\mu}{L}}\right) \|z_{k-1}\|_{y_{k-1}}^2 - \frac{1}{2\beta} \|z_k\|_{y_k}^2. \end{aligned} \quad (20)$$

Multiplying both sides of the inequality (20) by  $(1 - \sqrt{\mu/L})^{K-k}$  and assuming  $z_{-1} = z_0$ , summing it over  $k = 0, \dots, K-1$ , we obtain

$$f(x_K) - f(x_*) \leq \left(1 - \sqrt{\frac{\mu}{L}}\right)^K \left[ f(x_0) - f(x_*) + \frac{1}{2\beta} \left(1 - \sqrt{\mu/L}\right) \|z_0\|_{y_0}^2 \right].$$

This completes the proof.  $\square$

## E Proof of Theorem 2:

**Theorem 2** (General  $G$ -convex). *If  $f : \mathcal{X} \rightarrow \mathbb{R}$  is  $G$ -convex and  $G$ - $L$ -smooth, the diameter of domain is bounded by  $D$ ,  $\{x_k\}$  is produced by Algorithm 2, and let  $x_*$  be an optimal solution of Problem (1), then*

$$f(x_{k+1}) - f(x_*) \leq \frac{(\alpha - 1)^2}{2\eta(k + \alpha - 2)^2} \|z_0\|_{y_0}^2,$$

where  $z_0$  is defined in Lemma 2.

*Proof.* Using Lemma 3, we have

$$f(x_{k+1}) \leq f(x) + \langle \text{grad} f(y_k), -\text{Exp}_{y_k}^{-1}(x) \rangle_{y_k} - \frac{\eta}{2} \|\text{grad} f(y_k)\|_{y_k}^2, \quad \forall x \in \mathcal{X}.$$

Let us write successively this formula at  $x = x_k$  and  $x = x_*$ , we obtain

$$f(x_{k+1}) \leq f(x_k) + \langle \text{grad} f(y_k), -\text{Exp}_{y_k}^{-1}(x_k) \rangle_{y_k} - \frac{\eta}{2} \|\text{grad} f(y_k)\|_{y_k}^2, \quad (21)$$

and

$$\begin{aligned} f(x_{k+1}) &\leq f(x_*) + \langle \text{grad}f(y_k), -\text{Exp}_{y_k}^{-1}(x_*) \rangle_{y_k} - \frac{\eta}{2} \|\text{grad}f(y_k)\|_{y_k}^2, \\ &\leq f(x_*) + D \|\text{grad}f(y_k)\|_{y_k} - \frac{\eta}{2} \|\text{grad}f(y_k)\|_{y_k}^2, \end{aligned} \quad (22)$$

where the last inequality holds due to the assumption of  $d(y_k, x_*) = \|\text{Exp}_{y_k}^{-1}(x_*)\|_{y_k} \leq D$ .

Multiplying both sides of the inequality (21) by  $\frac{k}{k+\alpha-1}$ , and the inequality (22) by  $\frac{\alpha-1}{k+\alpha-1}$ , then adding the two resulting inequalities, we obtain

$$\begin{aligned} &f(x_{k+1}) \\ &\leq \frac{k}{k+\alpha-1} f(x_k) + \frac{\alpha-1}{k+\alpha-1} f(x_*) + \frac{k}{k+\alpha-1} \langle \text{grad}f(y_k), -\text{Exp}_{y_k}^{-1}(x_k) \rangle_{y_k} \\ &\quad + \frac{(\alpha-1)D}{k+\alpha-1} \|\text{grad}f(y_k)\|_{y_k} - \frac{\eta}{2} \|\text{grad}f(y_k)\|_{y_k}^2 \\ &= \frac{k}{k+\alpha-1} f(x_k) + \frac{\alpha-1}{k+\alpha-1} f(x_*) + \left\langle \text{grad}f(y_k), -\frac{k}{k+\alpha-1} \text{Exp}_{y_k}^{-1}(x_k) \right\rangle_{y_k} \\ &\quad + \left\langle \text{grad}f(y_k), \frac{(\alpha-1)D}{k+\alpha-1} \hat{g}_k \right\rangle_{y_k} - \frac{\eta}{2} \|\text{grad}f(y_k)\|_{y_k}^2 \\ &= \frac{k}{k+\alpha-1} f(x_k) + \frac{\alpha-1}{k+\alpha-1} f(x_*) + \frac{\alpha-1}{k+\alpha-1} \langle \text{grad}f(y_k), -z_k \rangle_{y_k} - \frac{\eta}{2} \|\text{grad}f(y_k)\|_{y_k}^2, \end{aligned}$$

where  $\hat{g}_k = \text{grad}f(y_k)/\|\text{grad}f(y_k)\|_{y_k}$ . By the above inequality and Lemma 2, we have

$$\begin{aligned} &f(x_{k+1}) - f(x_*) \\ &\leq \frac{k}{k+\alpha-1} [f(x_k) - f(x_*)] + \frac{(\alpha-1)^2}{2\eta(k+\alpha-1)^2} [\|z_k\|_{y_k}^2 - \|z_{k+1}\|_{y_{k+1}}^2]. \end{aligned}$$

Multiplying both sides of the above inequality by  $\frac{2\eta(k+\alpha-1)^2}{\alpha-1}$ , we have

$$\begin{aligned} &\frac{2\eta(k+\alpha-1)^2}{\alpha-1} [f(x_{k+1}) - f(x_*)] \\ &\leq \frac{2\eta k(k+\alpha-1)}{\alpha-1} [f(x_k) - f(x_*)] + (\alpha-1) [\|z_k\|_{y_k}^2 - \|z_{k+1}\|_{y_{k+1}}^2]. \end{aligned}$$

It is easy to verify that  $\frac{2\eta(k+\alpha-2)^2}{\alpha-1} \geq \frac{2\eta k(k+\alpha-1)}{\alpha-1}$ . Summing the above inequality over  $k = 0, \dots, K-1$ , we have

$$\begin{aligned} &\frac{2\eta(K+\alpha-2)^2}{\alpha-1} [f(x_K) - f(x_*)] \\ &\leq (\alpha-1) [\|z_0\|_{y_0}^2 - \|z_K\|_{y_K}^2]. \end{aligned}$$

Multiplying both sides of the above inequality by  $\frac{(\alpha-1)}{2\eta(K+\alpha-2)^2}$ , we have

$$f(x_K) - f(x_*) \leq \frac{(\alpha-1)^2}{2\eta(K+\alpha-2)^2} \|z_0\|_{y_0}^2.$$

This completes the proof.  $\square$

## F Complexity Analysis

In this part, we provide the detailed complexity analysis of our algorithm for solving the matrix Karcher mean problem. As stated in [3], the exponential mapping is expensive to compute in

practice. Therefore, we use the retraction  $R_X(\xi_X) = X + \xi_X + \frac{1}{2}\xi_X X^{-1}\xi_X$  in [1] to replace with the exponential mapping in our algorithm, where  $X \in \mathcal{P}$  and  $\xi_X \in T_X\mathcal{P}$ . Clearly, the retraction  $R_X$  is cheaper to compute and tends to avoid numerical overflow [3]. Then the main cost of RGD is the computation of the Riemannian gradient, and its overall per-iteration complexity is  $O((2N+3)d^3)$ . Compared with RGD, our accelerated method has one more update for  $Y_k$  in (14). The term  $\frac{1}{N}\sum_{i=1}^N \log(Y_{k-1}^{1/2}W_i^{-1}Y_{k-1}^{1/2})$  can be directly available from the evaluation of the Riemannian gradient at  $Y_{k-1}$ , and the term  $\log(Y_{k-1}^{-1/2}X_{k-1}Y_{k-1}^{-1/2})$  can also be obtained directly from (13). The cost of the computation of  $Y_k$  is  $O(4d^3)$ , and the overall per-iteration complexity of our accelerated method is  $O((2N+7)d^3)$ .

For fair comparison, we implemented RGD, LRBFGS<sup>2</sup>, and our accelerated method in Matlab, and performed all the experiments on a PC with an Intel i5-4570 CPU and 16GB RAM.

## References

- [1] B. Jeuris, R. Vandebril, and B. Vandereycken. A survey and comparison of contemporary algorithms for computing the matrix geometric mean. *Electronic Transactions on Numerical Analysis*, 39:379–402, 2012.
- [2] J. H. Manton. A globally convergent numerical algorithm for computing the center of mass on compact Lie groups. In *ICARCV*, pages 2211–2216, 2004.
- [3] X. Yuan, W. Huang, P.-A. Absil, and K. Gallivan. A Riemannian limited-memory BFGS algorithm for computing the matrix geometric mean. *Procedia Computer Science*, 80:2147–2157, 2016.
- [4] H. Zhang and S. Sra. First-order methods for geodesically convex optimization. In *COLT*, pages 1617–1638, 2016.

---

<sup>2</sup>[https://www.math.fsu.edu/~whuang2/Indices/index\\_Publications.html](https://www.math.fsu.edu/~whuang2/Indices/index_Publications.html)
